# Supplementary material for: Analysis of serious adverse events in a paediatric fast breathing pneumonia clinical trial in Malawi
Source: PubMed Central journal article supplement (PMC6733335; doi:10.1136/bmjresp-2019-000415), 2019-09-03
Supplement: bmjresp-2019-000415supp001.pdf [file bmjresp-2019-000415supp001.pdf]

## Supporting materials appendices

**S1 Appendix. Serious adverse event severity by treatment group**

|                            | Amoxicillin | Placebo | Overall |
|----------------------------|-------------|---------|---------|
| n SAEs                     | 46          | 56      | 102     |
| Severity                   |             |         |         |
| Pneumonia-related, n       | 34          | 43      | 77      |
| Grade 1 - Mild             | 0           | 0       | 0       |
| Grade 2 - Moderate         | 12          | 15      | 27      |
| Grade 3 - Severe           | 22          | 28      | 50      |
| Grade 4 - Life-threatening | 0           | 0       | 0       |
| Non-pneumonia related, n   | 12          | 13      | 25      |
| Grade 1 - Mild             | 1           | 0       | 1       |
| Grade 2 - Moderate         | 3           | 5       | 8       |
| Grade 3 - Severe           | 8           | 7       | 15      |
| Grade 4 - Life-threatening | 0           | 1       | 1       |

SAE=serious adverse event

**S2 Appendix. Length of hospitalization by age and treatment group**

|                                                                | Amoxicillin |            |          |          |          |          |           |          |            |
|----------------------------------------------------------------|-------------|------------|----------|----------|----------|----------|-----------|----------|------------|
|                                                                | n SAEs      | Mean (sd)  | 1 Day    | 2 Days   | 3 Days   | 4 Days   | 5 Days    | 6 Days   | 7+ days    |
| <b>Age 2-6 months</b>                                          |             |            |          |          |          |          |           |          |            |
| Fast breathing pneumonia                                       | 0           | --         | --       | --       | --       | --       | --        | --       | --         |
| Chest indrawing pneumonia                                      | 6           | 10.3 (4.0) | 0 (0.0%) | 0 (0.0%) | 0 (0.0%) | 0 (0.0%) | 1 (16.7%) | 0 (0.0%) | 5 (83.3%)  |
| Pneumonia with WHO general danger sign or respiratory distress | 0           | --         | --       | --       | --       | --       | --        | --       | --         |
| Chest radiograph confirmed pneumonia                           | 1           | 13.0 (--)  | 0 (0.0%) | 0 (0.0%) | 0 (0.0%) | 0 (0.0%) | 0 (0.0%)  | 0 (0.0%) | 1 (100.0%) |

|                                                                |   |            |               |          |          |              |           |           |            |
|----------------------------------------------------------------|---|------------|---------------|----------|----------|--------------|-----------|-----------|------------|
| Pneumonia                                                      | 1 | 1.0 (--)   | 1<br>(100.0%) | 0 (0.0%) | 0 (0.0%) | 0 (0.0%)     | 0 (0.0%)  | 0 (0.0%)  | 0 (0.0%)   |
| Acute gastroenteritis                                          | 1 | 12.0 (--)  | 0 (0.0%)      | 0 (0.0%) | 0 (0.0%) | 0 (0.0%)     | 0 (0.0%)  | 0 (0.0%)  | 1 (100.0%) |
| Fever                                                          | 0 | --         | --            | --       | --       | --           | --        | --        | --         |
| Malaria                                                        | 0 | --         | --            | --       | --       | --           | --        | --        | --         |
| Convulsion                                                     | 0 | --         | --            | --       | --       | --           | --        | --        | --         |
| Urinary tract infection                                        | 0 | --         | --            | --       | --       | --           | --        | --        | --         |
| Vomiting                                                       | 0 | --         | --            | --       | --       | --           | --        | --        | --         |
| Anemia                                                         | 0 | --         | --            | --       | --       | --           | --        | --        | --         |
| Epistaxis                                                      | 0 | --         | --            | --       | --       | --           | --        | --        | --         |
| Febrile convulsion                                             | 0 | --         | --            | --       | --       | --           | --        | --        | --         |
| <b>Age 7-11 months</b>                                         |   |            |               |          |          |              |           |           |            |
| Fast breathing pneumonia                                       | 1 | 34.0 (--)  | 0 (0.0%)      | 0 (0.0%) | 0 (0.0%) | 0 (0.0%)     | 0 (0.0%)  | 0 (0.0%)  | 1 (100.0%) |
| Chest indrawing pneumonia                                      | 1 | 10.0 (--)  | 0 (0.0%)      | 0 (0.0%) | 0 (0.0%) | 0 (0.0%)     | 0 (0.0%)  | 0 (0.0%)  | 1 (100.0%) |
| Pneumonia with WHO general danger sign or respiratory distress | 1 | 12.0 (--)  | 0 (0.0%)      | 0 (0.0%) | 0 (0.0%) | 0 (0.0%)     | 0 (0.0%)  | 0 (0.0%)  | 1 (100.0%) |
| Chest radiograph confirmed pneumonia                           | 1 | 7.0 (--)   | 0 (0.0%)      | 0 (0.0%) | 0 (0.0%) | 0 (0.0%)     | 0 (0.0%)  | 0 (0.0%)  | 1 (100.0%) |
| Pneumonia                                                      | 0 | --         | --            | --       | --       | --           | --        | --        | --         |
| Acute gastroenteritis                                          | 1 | 9.0 (--)   | 0 (0.0%)      | 0 (0.0%) | 0 (0.0%) | 0 (0.0%)     | 0 (0.0%)  | 0 (0.0%)  | 1 (100.0%) |
| Fever                                                          | 1 | 11.0 (--)  | 0 (0.0%)      | 0 (0.0%) | 0 (0.0%) | 0 (0.0%)     | 0 (0.0%)  | 0 (0.0%)  | 1 (100.0%) |
| Malaria                                                        | 1 | 13.0 (--)  | 0 (0.0%)      | 0 (0.0%) | 0 (0.0%) | 0 (0.0%)     | 0 (0.0%)  | 0 (0.0%)  | 1 (100.0%) |
| Convulsion                                                     | 0 | --         | --            | --       | --       | --           | --        | --        | --         |
| Urinary tract infection                                        | 0 | --         | --            | --       | --       | --           | --        | --        | --         |
| Vomiting                                                       | 0 | --         | --            | --       | --       | --           | --        | --        | --         |
| Anemia                                                         | 0 | --         | --            | --       | --       | --           | --        | --        | --         |
| Epistaxis                                                      | 0 | --         | --            | --       | --       | --           | --        | --        | --         |
| Febrile convulsion                                             | 0 | --         | --            | --       | --       | --           | --        | --        | --         |
| <b>Age 12-23 months</b>                                        |   |            |               |          |          |              |           |           |            |
| Fast breathing pneumonia                                       | 4 | 7.3 (2.1)  | 0 (0.0%)      | 0 (0.0%) | 0 (0.0%) | 0 (0.0%)     | 1 (25.0%) | 1 (25.0%) | 2 (50.0%)  |
| Chest indrawing pneumonia                                      | 7 | 12.1 (2.9) | 0 (0.0%)      | 0 (0.0%) | 0 (0.0%) | 0 (0.0%)     | 0 (0.0%)  | 0 (0.0%)  | 7 (100.0%) |
| Pneumonia with WHO general danger sign or respiratory distress | 3 | 5.3 (1.5)  | 0 (0.0%)      | 0 (0.0%) | 0 (0.0%) | 1<br>(33.3%) | 1 (33.3%) | 0 (0.0%)  | 1 (33.3%)  |

|                                                                |   |            |          |          |            |           |           |          |                |
|----------------------------------------------------------------|---|------------|----------|----------|------------|-----------|-----------|----------|----------------|
| Chest radiograph confirmed pneumonia                           | 2 | 9.0 (1.4)  | 0 (0.0%) | 0 (0.0%) | 0 (0.0%)   | 0 (0.0%)  | 0 (0.0%)  | 0 (0.0%) | 2 (100.0%)     |
| Pneumonia                                                      | 0 | --         | --       | --       | --         | --        | --        | --       | --             |
| Acute gastroenteritis                                          | 2 | 9.0 (5.7)  | 0 (0.0%) | 0 (0.0%) | 0 (0.0%)   | 0 (0.0%)  | 1 (50.0%) | 0 (0.0%) | 1 (50.0%)      |
| Fever                                                          | 0 | --         | --       | --       | --         | --        | --        | --       | --             |
| Malaria                                                        | 0 | --         | --       | --       | --         | --        | --        | --       | --             |
| Convulsion                                                     | 0 | --         | --       | --       | --         | --        | --        | --       | --             |
| Urinary tract infection                                        | 0 | --         | --       | --       | --         | --        | --        | --       | --             |
| Vomiting                                                       | 1 | 22.0 (--)  | 0 (0.0%) | 0 (0.0%) | 0 (0.0%)   | 0 (0.0%)  | 0 (0.0%)  | 0 (0.0%) | 1 (100.0%)     |
| Anemia                                                         | 0 | --         | --       | --       | --         | --        | --        | --       | --             |
| Epistaxis                                                      | 0 | --         | --       | --       | --         | --        | --        | --       | --             |
| Febrile convulsion                                             | 0 | --         | --       | --       | --         | --        | --        | --       | --             |
| <b>Age 24-59 months</b>                                        |   |            |          |          |            |           |           |          |                |
| Fast breathing pneumonia                                       | 2 | 8.0 (0.0)  | 0 (0.0%) | 0 (0.0%) | 0 (0.0%)   | 0 (0.0%)  | 0 (0.0%)  | 0 (0.0%) | 2 (100.0%)     |
| Chest indrawing pneumonia                                      | 3 | 4.7 (2.1)  | 0 (0.0%) | 0 (0.0%) | 1 (33.3%)  | 1 (33.3%) | 0 (0.0%)  | 0 (0.0%) | 1 (33.3%)      |
| Pneumonia with WHO general danger sign or respiratory distress | 1 | 27.0 (--)  | 0 (0.0%) | 0 (0.0%) | 0 (0.0%)   | 0 (0.0%)  | 0 (0.0%)  | 0 (0.0%) | 1 (100.0%)     |
| Chest radiograph confirmed pneumonia                           | 0 | --         | --       | --       | --         | --        | --        | --       | --             |
| Pneumonia                                                      | 0 | --         | --       | --       | --         | --        | --        | --       | --             |
| Acute gastroenteritis                                          | 0 | --         | --       | --       | --         | --        | --        | --       | --             |
| Fever                                                          | 0 | --         | --       | --       | --         | --        | --        | --       | --             |
| Malaria                                                        | 1 | 13.0 (--)  | 0 (0.0%) | 0 (0.0%) | 0 (0.0%)   | 0 (0.0%)  | 0 (0.0%)  | 0 (0.0%) | 1 (100.0%)     |
| Convulsion                                                     | 1 | 378.0 (--) | 0 (0.0%) | 0 (0.0%) | 0 (0.0%)   | 0 (0.0%)  | 0 (0.0%)  | 0 (0.0%) | 1 (100.0%)     |
| Urinary tract infection                                        | 0 | --         | --       | --       | --         | --        | --        | --       | --             |
| Vomiting                                                       | 1 | 11.0 (--)  | 0 (0.0%) | 0 (0.0%) | 0 (0.0%)   | 0 (0.0%)  | 0 (0.0%)  | 0 (0.0%) | 1 (100.0%)     |
| Anemia                                                         | 0 | --         | --       | --       | --         | --        | --        | --       | --             |
| Epistaxis                                                      | 1 | 3.0 (--)   | 0 (0.0%) | 0 (0.0%) | 1 (100.0%) | 0 (0.0%)  | 0 (0.0%)  | 0 (0.0%) | 0 (0.0%)       |
| Febrile convulsion                                             | 1 | 10.0 (--)  | 0 (0.0%) | 0 (0.0%) | 0 (0.0%)   | 0 (0.0%)  | 0 (0.0%)  | 0 (0.0%) | 1 (100.0%)     |
|                                                                |   |            |          |          |            |           |           |          | <b>Placebo</b> |

|                                                                | n<br>SAEs | Mean (sd)  | 1 Day    | 2 Days   | 3 Days        | 4 Days   | 5 Days    | 6 Days    | 7+ days        |
|----------------------------------------------------------------|-----------|------------|----------|----------|---------------|----------|-----------|-----------|----------------|
| <b>Age 2-6 months</b>                                          |           |            |          |          |               |          |           |           |                |
| Fast breathing pneumonia                                       | 3         | 7.0 (2.6)  | 0 (0.0%) | 0 (0.0%) | 0 (0.0%)      | 0 (0.0%) | 1 (33.3%) | 1 (33.3%) | 1 (33.3%)      |
| Chest indrawing pneumonia                                      | 10        | 11.7 (1.1) | 0 (0.0%) | 0 (0.0%) | 0 (0.0%)      | 0 (0.0%) | 0 (0.0%)  | 0 (0.0%)  | 10<br>(100.0%) |
| Pneumonia with WHO general danger sign or respiratory distress | 1         | 13.0 (--)  | 0 (0.0%) | 0 (0.0%) | 0 (0.0%)      | 0 (0.0%) | 0 (0.0%)  | 0 (0.0%)  | 1 (100.0%)     |
| Chest radiograph confirmed pneumonia                           | 0         | --         | --       | --       | --            | --       | --        | --        | --             |
| Pneumonia                                                      | 0         | --         | --       | --       | --            | --       | --        | --        | --             |
| Acute gastroenteritis                                          | 0         | --         | --       | --       | --            | --       | --        | --        | --             |
| Fever                                                          | 0         | --         | --       | --       | --            | --       | --        | --        | --             |
| Malaria                                                        | 0         | --         | --       | --       | --            | --       | --        | --        | --             |
| Convulsion                                                     | 0         | --         | --       | --       | --            | --       | --        | --        | --             |
| Urinary tract infection                                        | 0         | --         | --       | --       | --            | --       | --        | --        | --             |
| Vomiting                                                       | 0         | --         | --       | --       | --            | --       | --        | --        | --             |
| Anemia                                                         | 0         | --         | --       | --       | --            | --       | --        | --        | --             |
| Epistaxis                                                      | 0         | --         | --       | --       | --            | --       | --        | --        | --             |
| Febrile convulsion                                             | 0         | --         | --       | --       | --            | --       | --        | --        | --             |
| <b>Age 7-11 months</b>                                         |           |            |          |          |               |          |           |           |                |
| Fast breathing pneumonia                                       | 1         | 10.0 (--)  | 0 (0.0%) | 0 (0.0%) | 0 (0.0%)      | 0 (0.0%) | 0 (0.0%)  | 0 (0.0%)  | 1 (100.0%)     |
| Chest indrawing pneumonia                                      | 1         | 3.0 (--)   | 0 (0.0%) | 0 (0.0%) | 1<br>(100.0%) | 0 (0.0%) | 0 (0.0%)  | 0 (0.0%)  | 0 (0.0%)       |
| Pneumonia with WHO general danger sign or respiratory distress | 3         | 10.7 (2.5) | 0 (0.0%) | 0 (0.0%) | 0 (0.0%)      | 0 (0.0%) | 0 (0.0%)  | 0 (0.0%)  | 3 (100.0%)     |
| Chest radiograph confirmed pneumonia                           | 0         | --         | --       | --       | --            | --       | --        | --        | --             |
| Pneumonia                                                      | 0         | --         | --       | --       | --            | --       | --        | --        | --             |
| Acute gastroenteritis                                          | 3         | 7.3 (4.0)  | 0 (0.0%) | 0 (0.0%) | 0 (0.0%)      | 0 (0.0%) | 2 (66.7%) | 0 (0.0%)  | 1 (33.3%)      |
| Fever                                                          | 2         | 10.0 (2.8) | 0 (0.0%) | 0 (0.0%) | 0 (0.0%)      | 0 (0.0%) | 0 (0.0%)  | 0 (0.0%)  | 2 (100.0%)     |
| Malaria                                                        | 0         | --         | --       | --       | --            | --       | --        | --        | --             |
| Convulsion                                                     | 0         | --         | --       | --       | --            | --       | --        | --        | --             |

|                                                                |   |             |          |          |           |           |           |           |            |
|----------------------------------------------------------------|---|-------------|----------|----------|-----------|-----------|-----------|-----------|------------|
| Urinary tract infection                                        | 0 | --          | --       | --       | --        | --        | --        | --        | --         |
| Vomiting                                                       | 0 | --          | --       | --       | --        | --        | --        | --        | --         |
| Anemia                                                         | 0 | --          | --       | --       | --        | --        | --        | --        | --         |
| Epistaxis                                                      | 0 | --          | --       | --       | --        | --        | --        | --        | --         |
| Febrile convulsion                                             | 0 | --          | --       | --       | --        | --        | --        | --        | --         |
| <b>Age 12-23 months</b>                                        |   |             |          |          |           |           |           |           |            |
| Fast breathing pneumonia                                       | 5 | 7.4 (2.2)   | 0 (0.0%) | 0 (0.0%) | 0 (0.0%)  | 0 (0.0%)  | 1 (20.0%) | 0 (0.0%)  | 4 (80.0%)  |
| Chest indrawing pneumonia                                      | 6 | 10.3 (3.4)  | 0 (0.0%) | 0 (0.0%) | 0 (0.0%)  | 1 (16.7%) | 0 (0.0%)  | 0 (0.0%)  | 5 (83.3%)  |
| Pneumonia with WHO general danger sign or respiratory distress | 3 | 12.0 (1.0)  | 0 (0.0%) | 0 (0.0%) | 0 (0.0%)  | 0 (0.0%)  | 0 (0.0%)  | 0 (0.0%)  | 3 (100.0%) |
| Chest radiograph confirmed pneumonia                           | 0 | --          | --       | --       | --        | --        | --        | --        | --         |
| Pneumonia                                                      | 0 | --          | --       | --       | --        | --        | --        | --        | --         |
| Acute gastroenteritis                                          | 1 | 10.0 (--)   | 0 (0.0%) | 0 (0.0%) | 0 (0.0%)  | 0 (0.0%)  | 0 (0.0%)  | 0 (0.0%)  | 1 (100.0%) |
| Fever                                                          | 0 | --          | --       | --       | --        | --        | --        | --        | --         |
| Malaria                                                        | 1 | 8.0 (--)    | 0 (0.0%) | 0 (0.0%) | 0 (0.0%)  | 0 (0.0%)  | 0 (0.0%)  | 0 (0.0%)  | 1 (100.0%) |
| Convulsion                                                     | 1 | 13.0 (--)   | 0 (0.0%) | 0 (0.0%) | 0 (0.0%)  | 0 (0.0%)  | 0 (0.0%)  | 0 (0.0%)  | 1 (100.0%) |
| Urinary tract infection                                        | 0 | --          | --       | --       | --        | --        | --        | --        | --         |
| Vomiting                                                       | 0 | --          | --       | --       | --        | --        | --        | --        | --         |
| Anemia                                                         | 0 | --          | --       | --       | --        | --        | --        | --        | --         |
| Epistaxis                                                      | 0 | --          | --       | --       | --        | --        | --        | --        | --         |
| Febrile convulsion                                             | 0 | --          | --       | --       | --        | --        | --        | --        | --         |
| <b>Age 24-59 months</b>                                        |   |             |          |          |           |           |           |           |            |
| Fast breathing pneumonia                                       | 3 | 9.7 (2.3)   | 0 (0.0%) | 0 (0.0%) | 0 (0.0%)  | 0 (0.0%)  | 0 (0.0%)  | 0 (0.0%)  | 3 (100.0%) |
| Chest indrawing pneumonia                                      | 1 | 14.0 (--)   | 0 (0.0%) | 0 (0.0%) | 0 (0.0%)  | 0 (0.0%)  | 0 (0.0%)  | 0 (0.0%)  | 1 (100.0%) |
| Pneumonia with WHO general danger sign or respiratory distress | 2 | 4.5 (2.1)   | 0 (0.0%) | 0 (0.0%) | 1 (50.0%) | 0 (0.0%)  | 0 (0.0%)  | 1 (50.0%) | 0 (0.0%)   |
| Chest radiograph confirmed pneumonia                           | 4 | 17.8 (15.0) | 0 (0.0%) | 0 (0.0%) | 0 (0.0%)  | 0 (0.0%)  | 0 (0.0%)  | 0 (0.0%)  | 4 (100.0%) |
| Pneumonia                                                      | 0 | --          | --       | --       | --        | --        | --        | --        | --         |
| Acute gastroenteritis                                          | 0 | --          | --       | --       | --        | --        | --        | --        | --         |
| Fever                                                          | 2 | 10.0 (1.4)  | 0 (0.0%) | 0 (0.0%) | 0 (0.0%)  | 0 (0.0%)  | 0 (0.0%)  | 0 (0.0%)  | 2 (100.0%) |

|                         |   |            |          |          |          |          |          |          |            |
|-------------------------|---|------------|----------|----------|----------|----------|----------|----------|------------|
| Malaria                 | 0 | --         | --       | --       | --       | --       | --       | --       | --         |
| Convulsion              | 0 | --         | --       | --       | --       | --       | --       | --       | --         |
| Urinary tract infection | 2 | 11.5 (0.7) | 0 (0.0%) | 0 (0.0%) | 0 (0.0%) | 0 (0.0%) | 0 (0.0%) | 0 (0.0%) | 2 (100.0%) |
| Vomiting                | 0 | --         | --       | --       | --       | --       | --       | --       | --         |
| Anemia                  | 1 | 11.0 (--)  | 0 (0.0%) | 0 (0.0%) | 0 (0.0%) | 0 (0.0%) | 0 (0.0%) | 0 (0.0%) | 1 (100.0%) |
| Epistaxis               | 0 | --         | --       | --       | --       | --       | --       | --       | --         |
| Febrile convulsion      | 0 | --         | --       | --       | --       | --       | --       | --       | --         |

SAE=serious adverse event; sd=standard deviation; WHO=World Health Organization

### S3 Appendix. Adverse event and serious adverse event relationship to study drug

|                                                                                              | Amoxicillin |      | Placebo |      | Overall |
|----------------------------------------------------------------------------------------------|-------------|------|---------|------|---------|
|                                                                                              | N           | %    | N       | %    |         |
| Number enrolled, N                                                                           | 564         |      | 562     |      | 1126    |
| Number of serious adverse events, n <sup>1</sup>                                             | 46          | 8.2  | 56      |      | 102     |
| Not related                                                                                  | 42          | 91.3 | 52      | 92.9 | 94      |
| Possibly related                                                                             | 5           | 10.9 | 4       | 7.1  | 9       |
| Probably related                                                                             | 0           | 0.0  | 0       | 0.0  | 0       |
| Probably not related                                                                         | 0           | 0.0  | 0       | 0.0  | 0       |
|                                                                                              | N           | %    | N       | %    |         |
| Number of adverse events                                                                     | 200         | 45.4 | 241     | 54.6 | 441     |
| Relationship to study drug <sup>1</sup>                                                      |             |      |         |      |         |
| Not related                                                                                  | 191         | 95.5 | 230     | 95.4 | 421     |
| Possibly related                                                                             | 3           | 1.5  | 5       | 2.1  | 8       |
| Probably                                                                                     | 0           | 0.0  | 1       | 0.4  | 1       |
| Probably not                                                                                 | 6           | 3.0  | 5       | 2.1  | 11      |
|                                                                                              | N           | %    | N       | %    |         |
| Number of children with possible amoxicillin-related side-effect adverse events <sup>2</sup> | 77          | 13.7 | 241     | 0.4  | 160     |
| Skin conditions <sup>3</sup>                                                                 | 22          | 28.6 | 35      | 14.5 | 56      |

|                              |    |      |    |      |    |
|------------------------------|----|------|----|------|----|
| Eczema                       | 0  | 0.0  | 6  | 2.5  | 6  |
| Ecthyma                      | 1  | 4.5  | 0  | 0.0  | 1  |
| Folliculitis                 | 0  | 0.0  | 1  | 0.4  | 1  |
| Furunculosis                 | 0  | 0.0  | 1  | 0.4  | 1  |
| Impetigo                     | 1  | 4.5  | 2  | 0.8  | 3  |
| Urticaria                    | 1  | 4.5  | 4  | 1.7  | 5  |
| Rash                         | 8  | 10.4 | 12 | 5.0  | 20 |
| Larva migrans                | 1  | 4.5  | 0  | 0.0  | 1  |
| Miliaria                     | 2  | 9.1  | 2  | 0.8  | 4  |
| Ulcers/sores                 | 3  | 13.6 | 5  | 2.1  | 8  |
| Tenia capitis                | 3  | 13.6 | 2  | 0.8  | 5  |
| Tenia corporis               | 1  | 4.5  | 0  | 0.0  | 1  |
| Gastroenteritis <sup>3</sup> | 52 | 67.5 | 47 | 19.5 | 99 |
| Acute gastroenteritis        | 48 | 92.3 | 41 | 17.0 | 89 |
| Vomiting                     | 2  | 3.8  | 2  | 0.8  | 4  |
| Diarrhea                     | 2  | 3.8  | 4  | 1.7  | 5  |
| Candidiasis <sup>3</sup>     | 4  | 5.2  | 1  | 0.4  | 5  |

1. Percentages based on total number of adverse events and serious adverse events in each group.
2. Only applicable to the amoxicillin group: percentages based on total number children with possible amoxicillin-related side effect adverse events.
3. For the amoxicillin group, percentages based on total number of possible amoxicillin-related side effect adverse events. For the placebo group, percentages reflect total number of cases amongst those with an adverse event.

**S4a Appendix. Children without a serious adverse event, baseline characteristics**

|                                     | Amoxicillin<br>N=520 | Placebo<br>N=508 |
|-------------------------------------|----------------------|------------------|
| Age (months), mean (sd)             | 21.4 (15.3)          | 22.0 (15.0)      |
| 2 - 6 months, n (%)                 | 103 (19.8%)          | 96 (18.9%)       |
| 7 - 11 months, n (%)                | 77 (14.8%)           | 77 (15.2%)       |
| 12 - 35 months, n (%)               | 234 (45.0%)          | 230 (45.3%)      |
| 36 - 59 months, n (%)               | 106 (20.4%)          | 105 (20.7%)      |
| >59 months, n (%)                   | 0 (0.0%)             | 0 (0.0%)         |
| Gender                              |                      |                  |
| Male, n (%)                         | 244 (46.9%)          | 232 (45.7%)      |
| Female, n (%)                       | 276 (53.1%)          | 276 (54.3%)      |
| Weight (kg), n                      | 519                  | 508              |
| Mean (sd)                           | 10.5 (2.7)           | 10.6 (2.6)       |
| Height/length (cm), n               | 519                  | 508              |
| Mean (sd)                           | 78.4 (12.4)          | 79.0 (12.1)      |
| Height/weight Z-score, n (%)        | 519                  | 508              |
| Greater than -2                     | 515 (99.0%)          | 500 (98.4%)      |
| Between -2 and -3                   | 4 (0.8%)             | 7 (1.4%)         |
| Less than -3                        | 0 (0.0%)             | 1 (0.2%)         |
| Mean (sd)                           | 0.5 (1.2)            | 0.4 (1.2)        |
| Mid-Upper Arm Circumference (mm), n | 519                  | 508              |
| >125                                | 491 (94.4%)          | 470 (92.5%)      |
| 115 - 125                           | 28 (5.4%)            | 38 (7.5%)        |
| <115                                | 0 (0.0%)             | 0 (0.0%)         |
| Mean (sd)                           | 151.2 (11.3)         | 151.0 (12.0)     |

sd=standard deviation; kg=kilograms; cm=centimeters; mm=millimeters



**S4b Appendix. Children without a serious adverse event, physical exam and laboratory results**

|                                             | Amoxicillin<br>N=520 | Placebo<br>N=508 |
|---------------------------------------------|----------------------|------------------|
| Respiratory rate (breaths/min) <sup>1</sup> |                      |                  |
| <40, n (%)                                  | 0 (0.0%)             | 0 (0.0%)         |
| 40 - 49, n (%)                              | 220 (42.3%)          | 213 (41.9%)      |
| >49, n (%)                                  | 300 (57.7%)          | 295 (58.1%)      |
| Unknown, n (%)                              | 0 (0.0%)             | 0 (0.0%)         |
| Oxygen saturation <sup>1</sup>              |                      |                  |
| < 90%, n (%)                                | 0 (0.0%)             | 0 (0.0%)         |
| 90% - 93%, n (%)                            | 0 (0.0%)             | 0 (0.0%)         |
| > 93%, n (%)                                | 520 (100.0%)         | 508 (100.0%)     |
| Unknown, n (%)                              | 0 (0.0%)             | 0 (0.0%)         |
| Axillary temperature <sup>1</sup>           |                      |                  |
| ≥38 °C, n (%)                               | 167 (32.1%)          | 143 (28.1%)      |
| <38 °C, n (%)                               | 353 (67.9%)          | 365 (71.9%)      |
| Unknown, n (%)                              | 0 (0.0%)             | 0 (0.0%)         |
| Heart rate (beats/min) <sup>1</sup>         |                      |                  |
| Median                                      | 147                  | 147              |
| Min, Max                                    | 101, 190             | 101, 196         |
| HemoCue                                     |                      |                  |
| Mean (sd)                                   | 10.8 (1.2)           | 10.9 (1.2)       |
| Malaria                                     |                      |                  |
| Positive, n (%)                             | 71 (13.7%)           | 65 (12.8%)       |
| Negative, n (%)                             | 449 (86.3%)          | 443 (87.2%)      |

1. Highest value between screening and enrollment

**S4c Appendix. Children without a serious adverse event, respiratory rate frequencies by age and treatment group**

|                  | Amoxicillin<br>N=520 | Placebo<br>N=508 |
|------------------|----------------------|------------------|
| Age 2-11 months  |                      |                  |
| RR <50           | 0 (0.0%)             | 0 (0.0%)         |
| RR 50-59         | 1 (0.6%)             | 0 (0.0%)         |
| RR ≥60           | 179<br>(99.4%)       | 173<br>(100.0%)  |
| Age 12-59 months |                      |                  |
| RR <40           | 219<br>(64.4%)       | 213 (63.6%)      |
| RR 40-49         | 106<br>(31.2%)       | 110 (32.8%)      |
| RR ≥50           | 15 (4.4%)            | 12 (3.6%)        |

RR = respiratory rate
